# Supplementary material
Source: PubMed Central journal article supplement (PMC7416462)

# nature research

## Publishing Worksheet for Authors

CORRESPONDING AUTHOR: Adamson

MS NUMBER: NBT-BC46864C

MS TYPE: Brief Communication

### Instructions:

- Review each point
- Initial for completion
- If required, ensure that there is an appropriate statement in the body of your paper
- Upload the completed and signed worksheet along with other required documents as separate files with your final submission. Please note that certain forms may require a physical signature. Submitting a digitally signed form may delay acceptance.

Please note that failure to provide the requested documents and information will delay acceptance and publication of your paper. For additional guidance, please contact our editorial assistant at [biotech@us.nature.com](mailto:biotech@us.nature.com).

| POLICY REQUIREMENTS                                                                                                                                                                                                                                                                                                                                                                                                                                                                                                                                                                                                                                                                                                                                                                                                                                                                                                                                                                                                                                 |                                  |
|-----------------------------------------------------------------------------------------------------------------------------------------------------------------------------------------------------------------------------------------------------------------------------------------------------------------------------------------------------------------------------------------------------------------------------------------------------------------------------------------------------------------------------------------------------------------------------------------------------------------------------------------------------------------------------------------------------------------------------------------------------------------------------------------------------------------------------------------------------------------------------------------------------------------------------------------------------------------------------------------------------------------------------------------------------|----------------------------------|
| PERMISSION TO PUBLISH                                                                                                                                                                                                                                                                                                                                                                                                                                                                                                                                                                                                                                                                                                                                                                                                                                                                                                                                                                                                                               | Author Confirmation              |
| <p><b>Before we can move ahead with acceptance and publication of your paper we must receive formal written permission use, edit, publish and distribute your work.</b></p> <p>You will retain copyright your paper, but you are granting Nature Research certain rights and permissions for the full term of copyright and any extension thereto, as outlined in the License to Publish form.</p> <p><b>Please complete, sign, and return the form linked below.</b> We cannot accept “e-signatures” on any legal document, so please return the form with a handwritten signature, or an embedded image of a handwritten signature. <b>All legal forms must be signed by the corresponding author.</b></p> <p><b>List all contributing authors on the License to Publish. If you cannot fit the names in the provided field, please instead write “see attached page” and include a second page with the full author list.</b></p> <p><a href="http://www.nature.com/documents/sna-ltp.docx">http://www.nature.com/documents/sna-ltp.docx</a></p> | <p>Author Initial <u>BSA</u></p> |

|                                                                                                                                                                                                                                                                                                                                                                                                                                                                                                                                                                                                                                                                                                                                                                                                                                                                                                                                                                                                                                                                                                                                             |                                                                                                                                                    |
|---------------------------------------------------------------------------------------------------------------------------------------------------------------------------------------------------------------------------------------------------------------------------------------------------------------------------------------------------------------------------------------------------------------------------------------------------------------------------------------------------------------------------------------------------------------------------------------------------------------------------------------------------------------------------------------------------------------------------------------------------------------------------------------------------------------------------------------------------------------------------------------------------------------------------------------------------------------------------------------------------------------------------------------------------------------------------------------------------------------------------------------------|----------------------------------------------------------------------------------------------------------------------------------------------------|
| <p>If any listed authors received grants or funding then that information must be provided. <b>Please list each grant number, followed by the initials of the author who received it, in the Acknowledgements section of your paper.</b></p>                                                                                                                                                                                                                                                                                                                                                                                                                                                                                                                                                                                                                                                                                                                                                                                                                                                                                                | <p>I hereby certify that I have listed all applicable funding sources in accordance with NRG's funding mandates.<br/>Author Initial <u>BSA</u></p> |
| <p><b>OPEN ACCESS WAIVER</b></p>                                                                                                                                                                                                                                                                                                                                                                                                                                                                                                                                                                                                                                                                                                                                                                                                                                                                                                                                                                                                                                                                                                            |                                                                                                                                                    |
| <p>We note that one or more authors is from one or more of the following institutions:</p> <ul style="list-style-type: none"> <li>• <a href="#">California Institute of Technology</a></li> <li>• <a href="#">Georgia Tech</a></li> <li>• <a href="#">Harvard School of Public Health</a></li> <li>• <a href="#">Harvard University, Faculty of Arts and Sciences</a></li> <li>• <a href="#">MIT</a></li> <li>• <a href="#">Princeton University</a></li> <li>• <a href="#">University of California, San Francisco (UCSF)</a></li> <li>• <a href="#">University of Hawai'i at Mānoa</a></li> <li>• <a href="#">University of Rhode Island</a></li> </ul> <p style="margin-left: 300px;"><i>pending</i></p> <p>We understand that these authors are subject to their institutions' respective open access policies and we will need you to provide us with a waiver from the institution of every affected author on the manuscript. <b>Please collate all waivers and return them with your final submission.</b></p> <p>More information on Nature Research's compliance with Open Access mandates can be found <a href="#">here</a>.</p> | <p>Author Confirmation</p> <p>Author Initial _____</p>                                                                                             |
| <p><b>THIRD-PARTY RIGHTS AND REUSE PERMISSIONS</b></p>                                                                                                                                                                                                                                                                                                                                                                                                                                                                                                                                                                                                                                                                                                                                                                                                                                                                                                                                                                                                                                                                                      |                                                                                                                                                    |
| <p><b>You must obtain the right to use any figures, tables, images, videos or text boxes that are reproduced (or adapted) from material that you do not own. You also must give proper attribution to the creators of that work. This includes work that has previously been published elsewhere.</b></p> <p>If you do not own any such item (in whole or part) that is included in your paper, you must complete and return a <a href="#">Third Party Rights Table BH</a>.</p> <p>If you have any questions please contact our Editorial Assistant at <a href="mailto:biotech@us.nature.com">biotech@us.nature.com</a>.</p>                                                                                                                                                                                                                                                                                                                                                                                                                                                                                                                | <p>Author Confirmation</p> <p>Author Initial <u>BSA</u></p>                                                                                        |

**FORMATTING REQUIREMENTS: Author; please initial for confirmation of ALL points below \_\_\_\_\_**

|                                                                                                                                                                                                                                                                                                                                                                                                                                                                         |
|-------------------------------------------------------------------------------------------------------------------------------------------------------------------------------------------------------------------------------------------------------------------------------------------------------------------------------------------------------------------------------------------------------------------------------------------------------------------------|
| <p><b>MAIN TEXT</b></p>                                                                                                                                                                                                                                                                                                                                                                                                                                                 |
| <p><b>The main text file and associated tables must be submitted in Microsoft Word format.</b><br/>All manuscripts <b>must</b> include the following sections, ordered as listed:</p> <p><b>Brief Communication</b></p> <ul style="list-style-type: none"> <li>• Title</li> <li>• Author List and affiliations</li> <li>• Abstract</li> <li>• Main Text</li> <li>• Acknowledgements</li> <li>• Author Contributions</li> <li>• Competing Interests Statement</li> </ul> |



- Graphical data in all figures have error bars, if applicable, and definition of the error bars (i.e. s.e.m. or s.d.)
- All photographic images have scale bars (rather than numerical descriptions of magnification), as applicable.
- Figures are provided in RGB color mode. Note that if this is not possible the colors may appear somewhat differently in the published articles
- Panel labels are placed on top of images

**SUPPLEMENTARY INFORMATION**

**See attached Inventory of Supporting Information. Instructions are included. Complete and upload with your final files.** Unless otherwise stated please limit individual file sizes to approximately 30MB. We strongly encourage the use of repositories for large datasets or source data due to size considerations.

**Supplementary Videos**

Please cite all supplementary videos as "videos," not as "movies."

- .MOV format is preferred

Size your videos to 1,280 x 768 pixels or other aspect ratio with similar height or width.

I hereby certify that I have reviewed and verified all points requested to the best of my ability and have included all required documentation with my final submission. SIGNED: 

Supplement: NIHMS1567479-supplement-9.pdf [file NIHMS1567479-supplement-9.pdf]
