# Supplementary material
Source: PubMed Central journal article supplement (PMC7416462)
Supplement: NIHMS1567479-supplement-4.pdf [file NIHMS1567479-supplement-4.pdf]

## Copyright Waiver: Scalable, combinatorial single-cell CRISPR screens by guide RNA capture and targeted sequencing, Nature Biotechnology

noreply@princeton.edu <noreply@princeton.edu>

Tue 2/18/2020 12:58 PM

To: badamson@princeton.edu <badamson@princeton.edu>; badamson@princeton.edu <badamson@princeton.edu>

Cc: Replogle, Joseph <Joseph.Replogle@ucsf.edu>

To whom it may concern:

As per request, Princeton University hereby waives the rights that would otherwise flow to it pursuant to the policy on copyrights approved at its faculty meeting of September 19, 2011. This waiver applies to the following article:

'Scalable, combinatorial single-cell CRISPR screens by guide RNA capture and targeted sequencing' in Nature Biotechnology

If the article specified above arose from NIH-funded research, please note that the University's waiver of its own copyrights in no way diminishes your obligations under the NIH Public Access Policy. You must accordingly take care that your contracts with publishers reserve rights sufficient to comply with the NIH policy.

If you have any questions about the University copyright policy visit [https://urldefense.proofpoint.com/v2/url?u=http-3A-www.princeton.edu\\_dof\\_policies\\_publ\\_fac\\_open-2Daccess-2Dpolicy&d=DwlCaQ&c=iORugZls2LIYyCAZRB3XLg&r=15hPj6XxTn8tgWCPTsLExvSJgtX1XjoeLCN507L4Ai0&m=byPgusFP\\_oCdRQtHU2qdBZAhiNhNrl-B0JFeqekLsls&s=rdmK-0ghz9F0cPsCptXr-C8YpRYvomTTX1KbhT61eKc&e=](https://urldefense.proofpoint.com/v2/url?u=http-3A-www.princeton.edu_dof_policies_publ_fac_open-2Daccess-2Dpolicy&d=DwlCaQ&c=iORugZls2LIYyCAZRB3XLg&r=15hPj6XxTn8tgWCPTsLExvSJgtX1XjoeLCN507L4Ai0&m=byPgusFP_oCdRQtHU2qdBZAhiNhNrl-B0JFeqekLsls&s=rdmK-0ghz9F0cPsCptXr-C8YpRYvomTTX1KbhT61eKc&e=) .

You are encouraged to contact the Office of the Dean of the Faculty at dof@princeton.edu.

Sincerely,

Deborah Prentice  
Provost
