# Supplementary material
Source: PubMed Central journal article supplement (PMC7416462)
Supplement: NIHMS1567479-supplement-8.pdf [file NIHMS1567479-supplement-8.pdf]

**Colour Charges Form – Nature Research Journals****COLOUR FIGURES**

Nature Research Journals are committed to providing authors with the highest quality figures, and we use the latest techniques to achieve this reproduction. We therefore charge authors a fee of €360/ £320/ \$430 per figure for reproduction in full colour. Please note that we do not offer a colour online only option.

No author will be denied publication based on his/her inability to meet these charges. If we agree that colour is essential but you are unable to meet the costs, they may be able to be waived if you explain the circumstances before your paper is published. Otherwise you will be billed after publication.

Authors will be charged in the currency that is most applicable to the corresponding author's address. (Please note that in EU countries VAT will be added if you are unable to provide us with your VAT details below.)

**PLEASE COMPLETE AND SIGN THE SECTION BELOW AND RETURN A COPY OF THIS SHEET TO THE EDITORIAL ASSISTANT BY REPLYING TO THE EMAIL, WHERE THE LINK TO THIS FORM CAN BE FOUND. PLEASE NOTE: THERE ARE 2 PAGES TO THE FORM.**

Corresponding Author Name Britt Adamson & JONATHAN WEISSMAN

Journal

Nature Biotechnology

Manuscript Reference Number:

NBT-TR46864C

Contact Name (please note: this will be the person that will process the invoice)

Joan Kanter

Contact email address (please note: this is where the invoice will be sent)

Joan.Kanter@ucsf.edu

Contact Address:

Department: HHMI Institution/Organisation UCSF

First line of your address: 1700 4th St.

Second line of your address: Byers Hall Room 403B

City: San Francisco Postal Code: 94158 Country US
